# Supplementary material for: Evaluation of 4-Aminoquinoline Hydrazone Analogues as Potential Leads for Drug-Resistant Malaria
Source: MDPI journal article supplement (doi:10.3390/molecules28186471), 2023-09-06
Supplement: s1 [file s1]

## Supplementary Materials

### Evaluation of 4-Aminoquinoline Hydrazone Analogues as Potential Leads for Drug-Resistant Malaria

Rachael N. Magwaza <sup>1,2</sup>, Muna Abubaker <sup>2</sup>, Buthaina Hussain <sup>3</sup>, Michael Haley <sup>4</sup>, Kevin Couper <sup>4</sup>, Sally Freeman <sup>1,\*</sup> and Niroshini J. Nirmalan <sup>2,\*</sup>

<sup>1</sup> Division of Pharmacy and Optometry, School of Health Sciences, University of Manchester, Manchester M13 9PT, UK

<sup>2</sup> School of Science, Engineering and Environment, University of Salford, Manchester M5 4WT, UK; r.n.magwaza@salford.ac.uk (R.N.M.); m.abubaker2@salford.ac.uk (M.A.)

<sup>3</sup> Faculty of Pharmacy, Al-Zaytoonah University of Jordan, Amman 17138, Jordan; buthina.hussein@zuj.edu.jo

<sup>4</sup> School of Biological Sciences, Lydia Becker Institute of Immunology and Infection, University of Manchester, Manchester M13 9PT, UK; michael.haley@manchester.ac.uk (M.H.); kevin.couper@manchester.ac.uk (K.C.)

\* Correspondence: sally.freeman@manchester.ac.uk (S.F.); n.j.nirmalan@salford.ac.uk (N.J.N.)

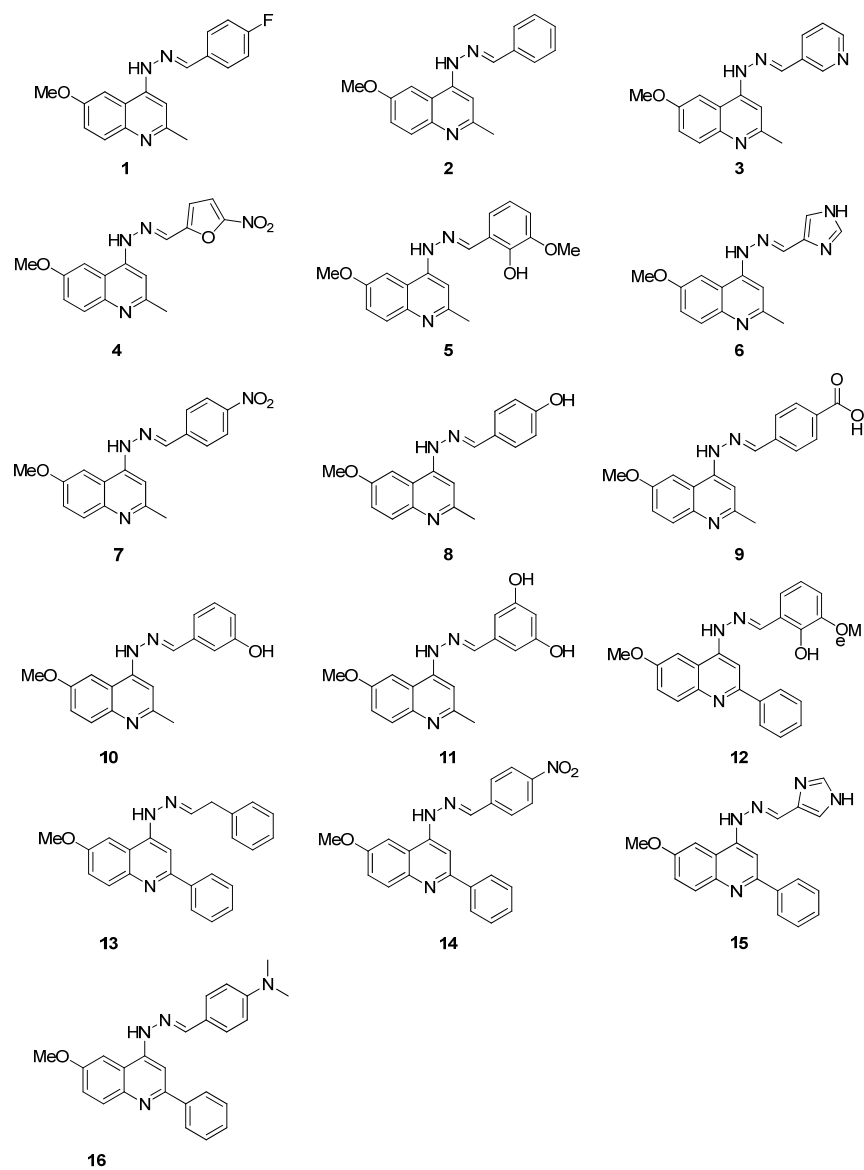

**Figure S1.** Structures of the 4-aminoquinoline hydrazone compounds that were tested for their antimalarial activities.

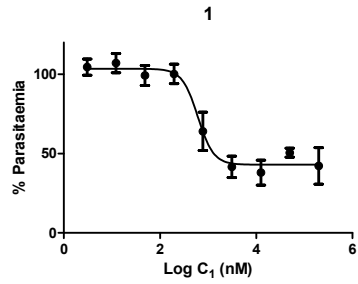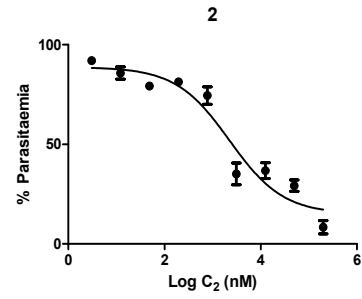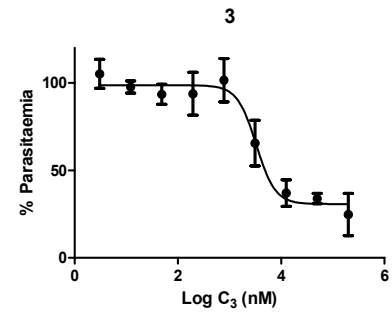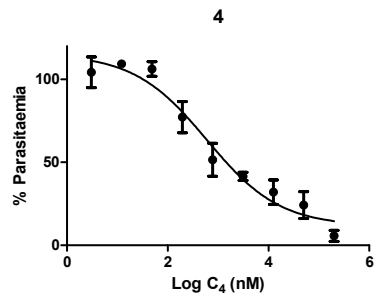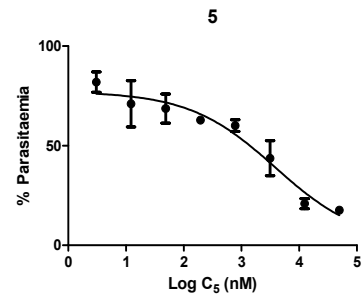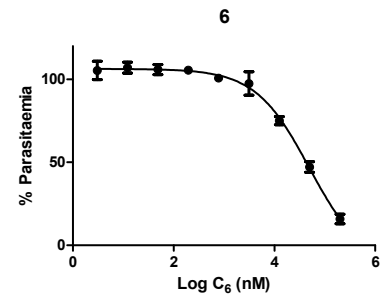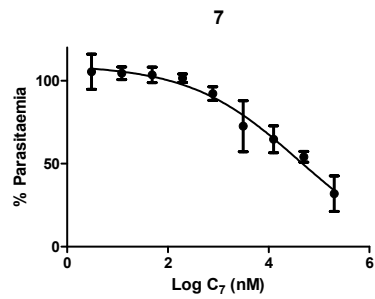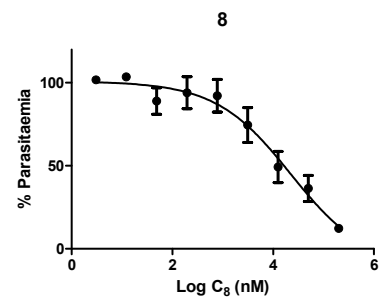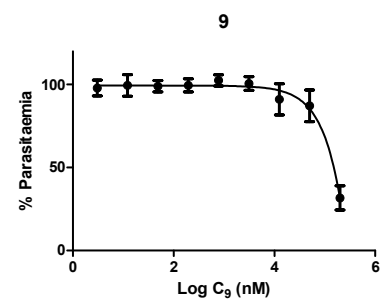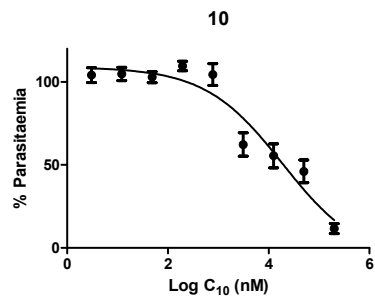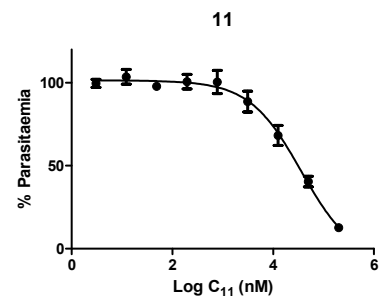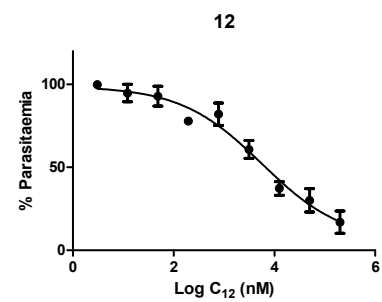

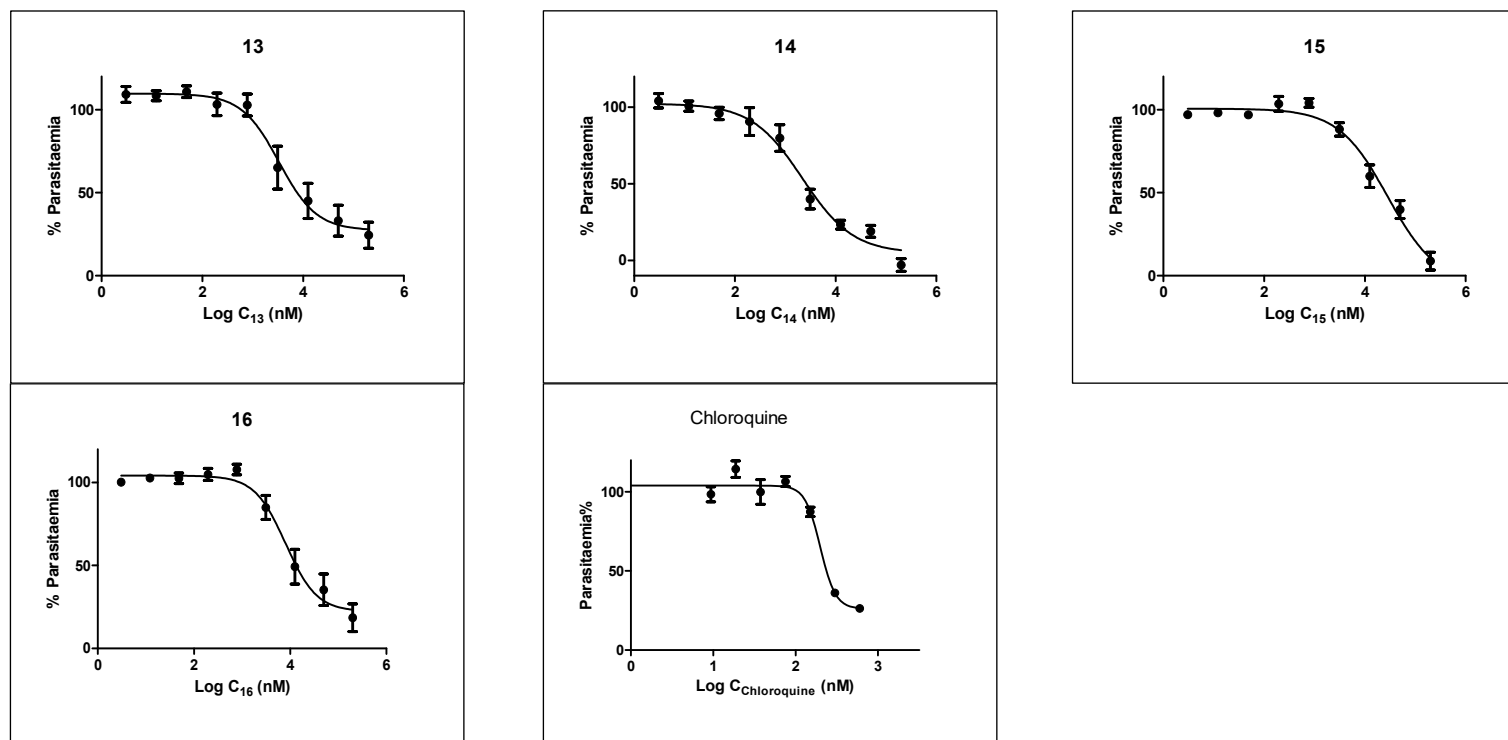

**Figure S2.** The effect of the 4-aminoquinoline hydrazone compounds along with chloroquine tested on the *P. falciparum* K1 strain (trophozoite stage). The 4-aminoquinoline hydrazones were tested in four-fold serial dilutions from 0.00305 - 200  $\mu$ M, while Chloroquine was tested at a dose of 9.3 - 600 nM. The compounds were incubated for 48 hours and read using SYBER green-based plate reader assay. The experiments were performed three times in triplicates. The data was analysed using GraphPad prism.

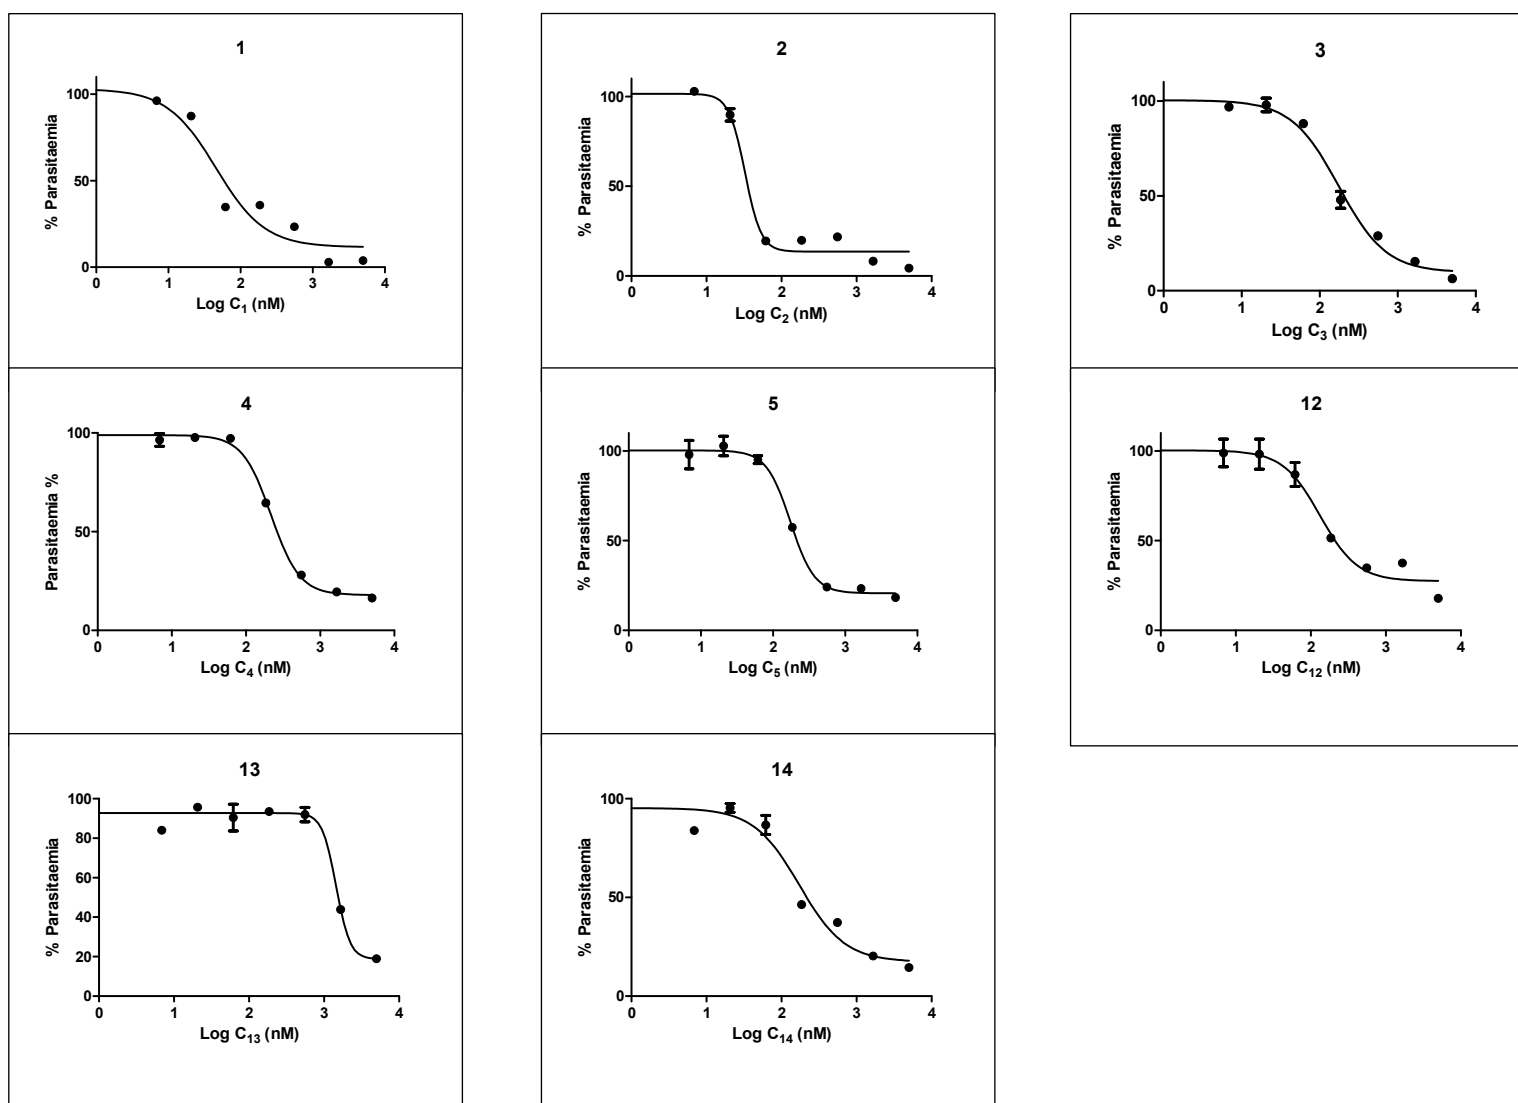

**Figure S3.** The effect dose of the 4-aminoquinoline hydrazone compounds tested on the *P. falciparum* K1 strain (ring stage). The compounds were tested in four-fold serial dilutions from 0.00305 - 200  $\mu$ M, incubated for 72 hours and read using SYBER green-based plate reader assay. The experiments were performed three times in triplicates. The data was analysed using GraphPad prism.

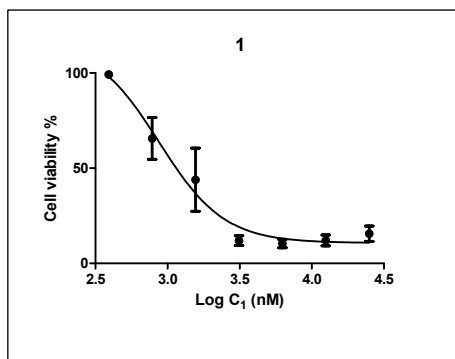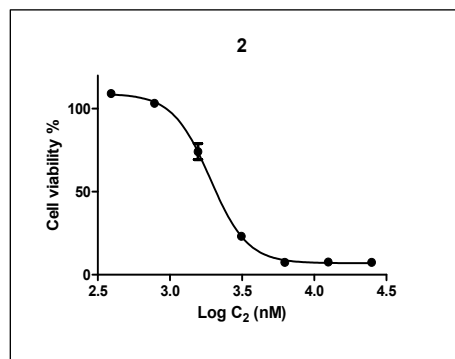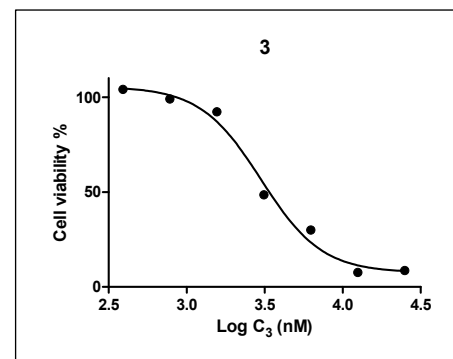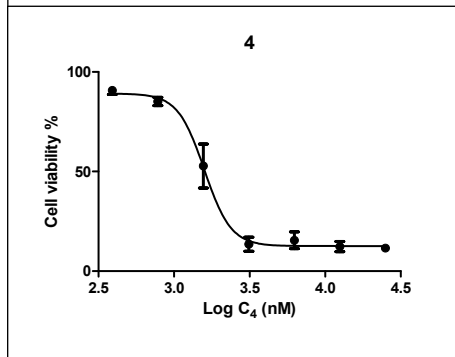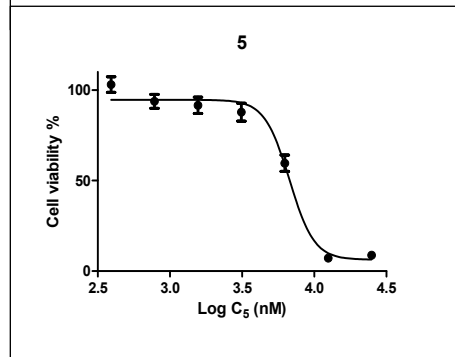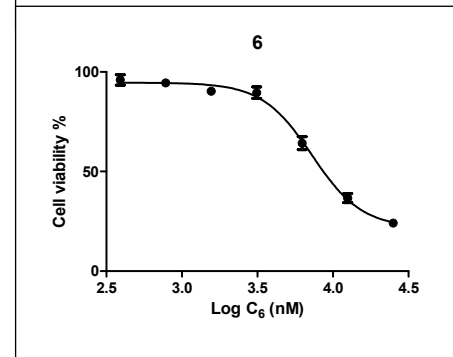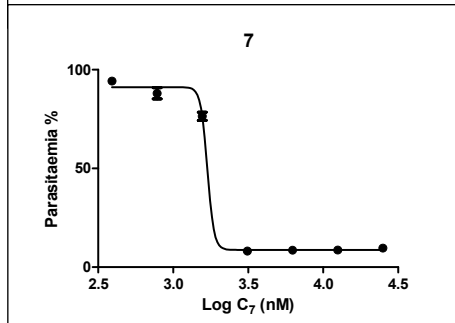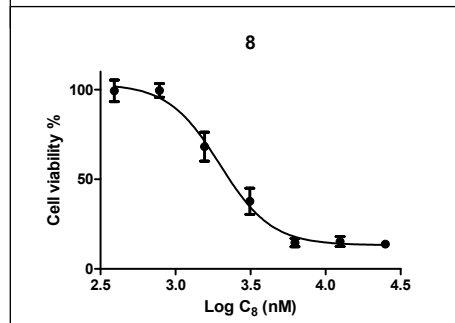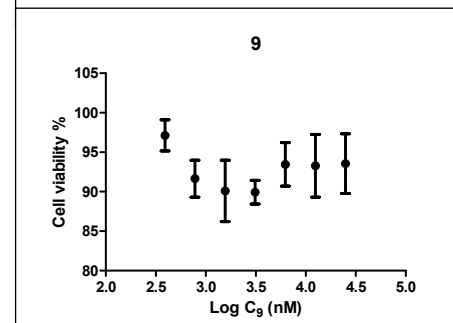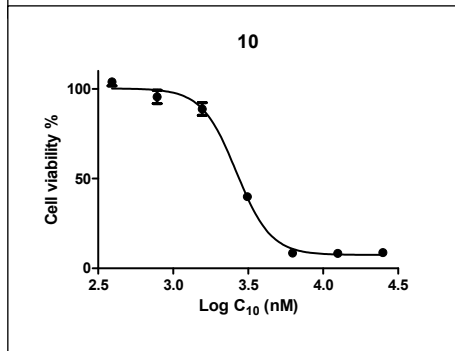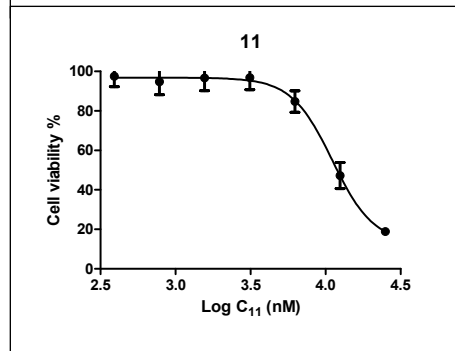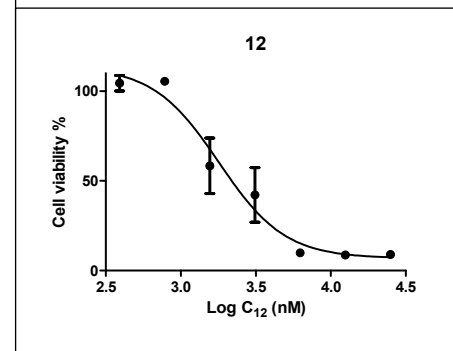

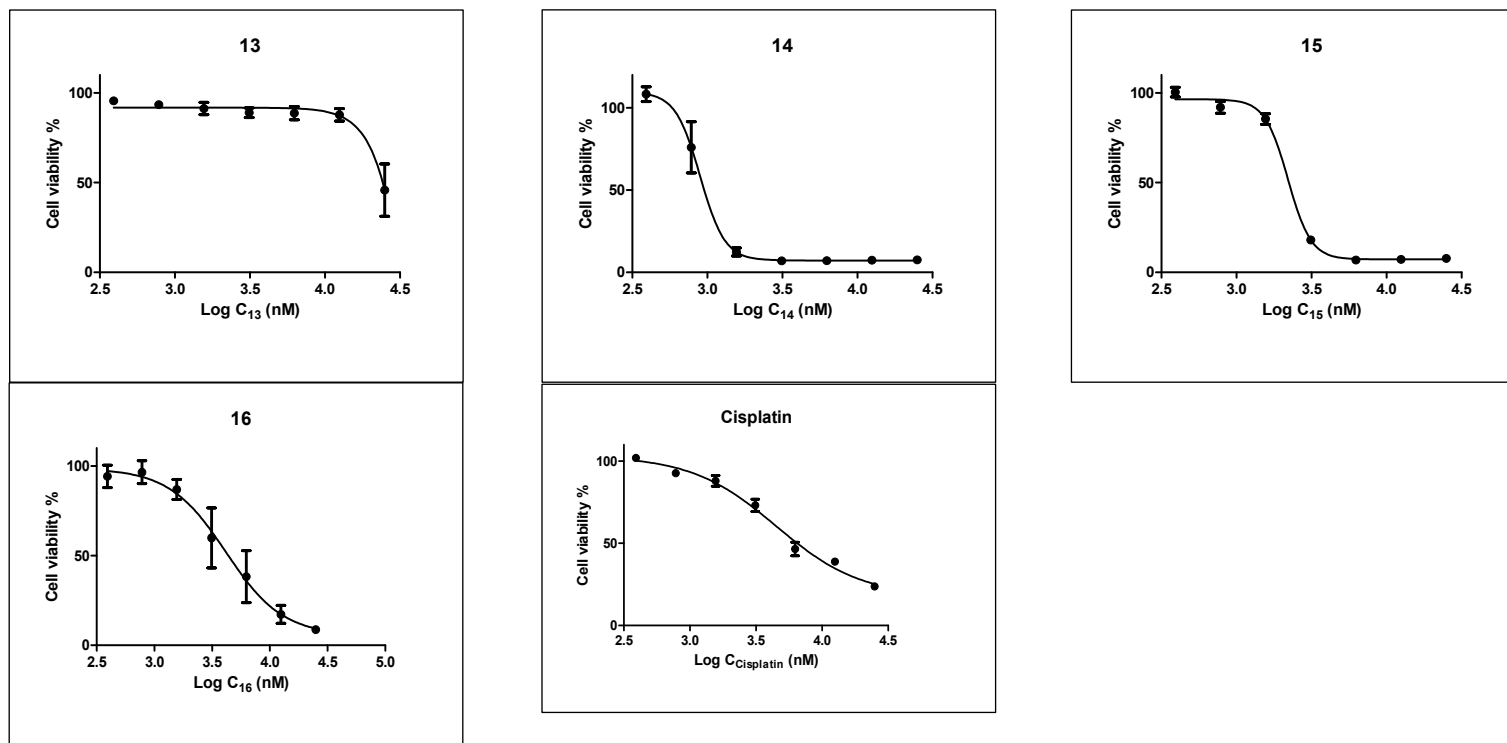

**Figure S4.** MTT assay was assessed on Hep G2 cells. The cells were seeded at 4000 cells per well. The HepG2 cells were incubated with two-fold serial dilution of the compounds at dose range of 0.39 -25  $\mu$ M for 5 days. Cell viability was determined using the standard MTT assay. Data was analysed using GraphPad prism. The experiments were performed three times; each concentration was repeated three times per experiment.

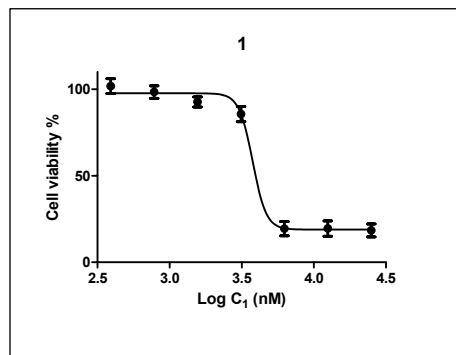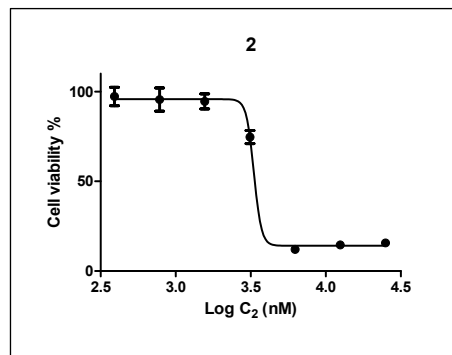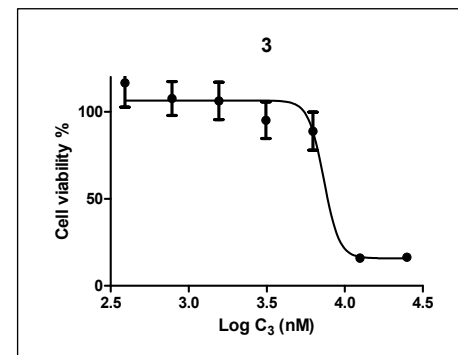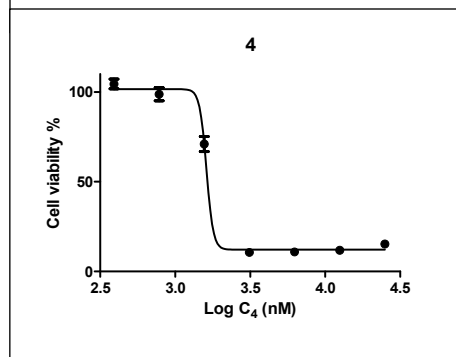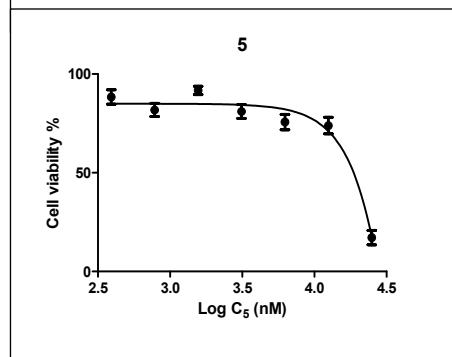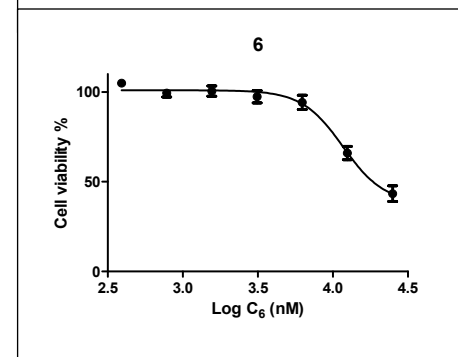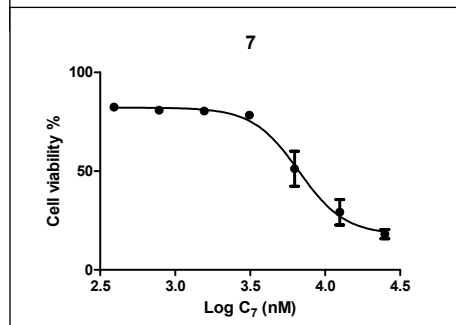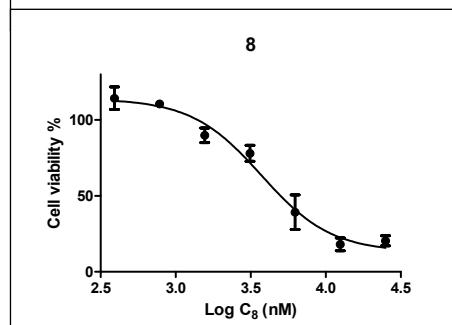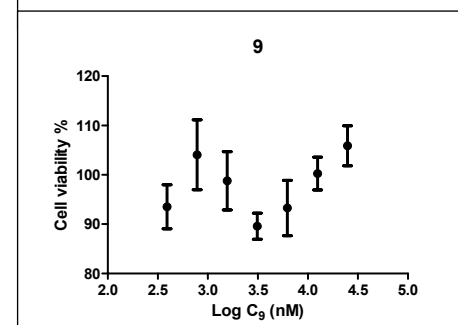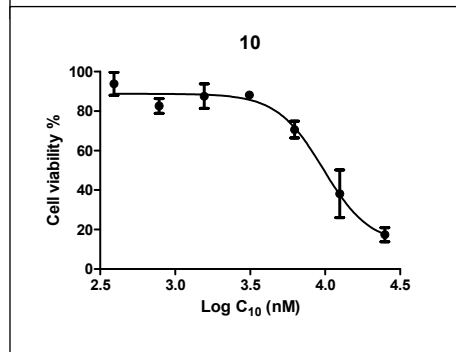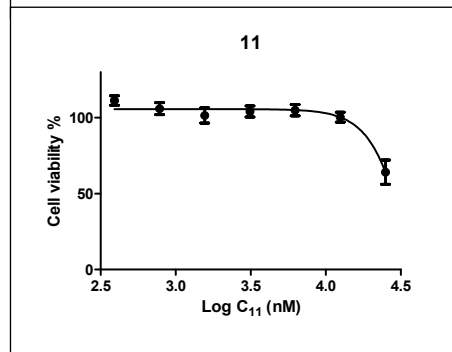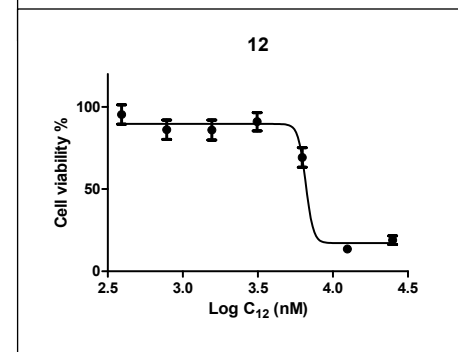



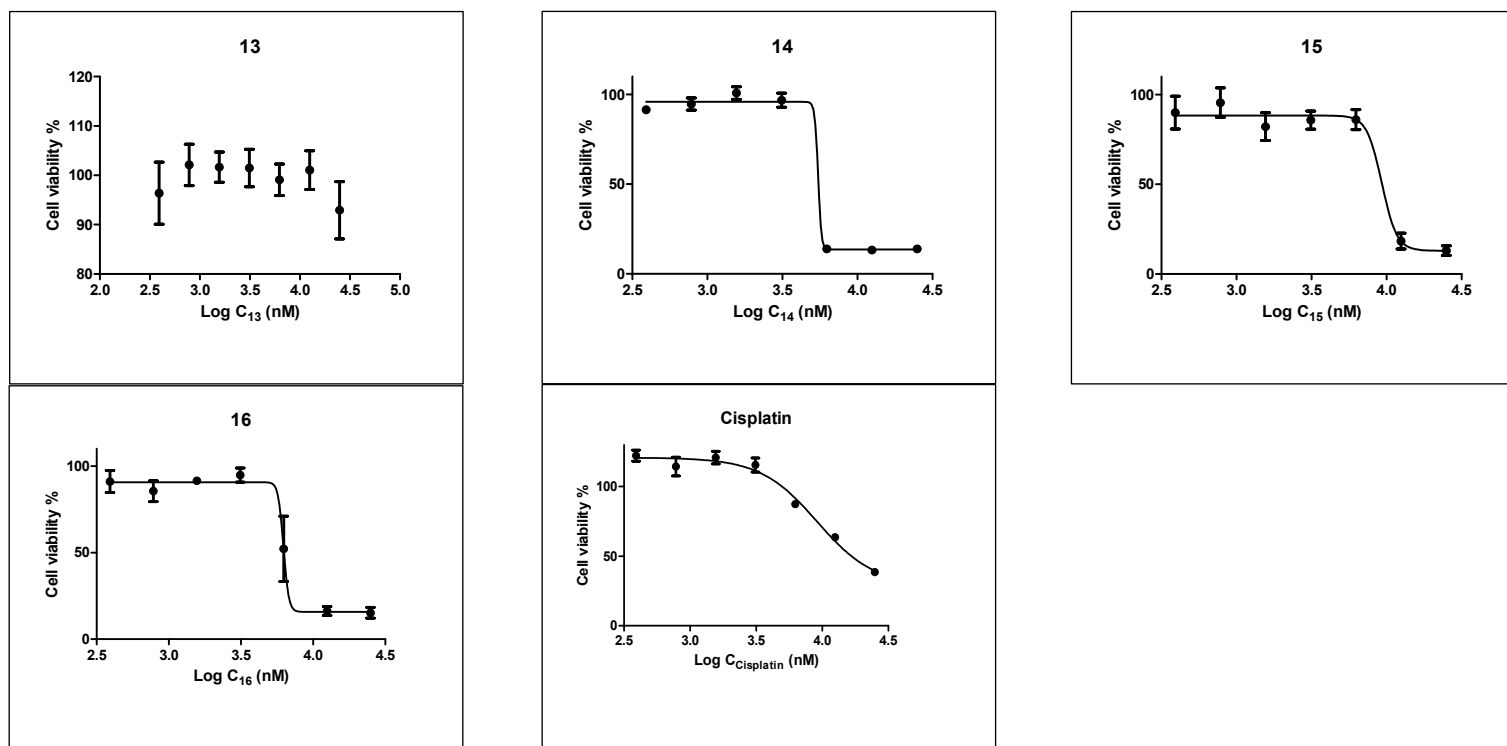

**Figure S5.** MTT assay was assessed on MDBK cells. The cells were seeded at 4000 cells per well. The MDBK cells were incubated with two- old serial dilution of compounds at dose range of 0.39 -25  $\mu$ M for 5 days. Cell viability was determined using the standard MTT assay. Data was analysed using GraphPad prism. The experiments were performed three times; each concentration was repeated three times per experiment.

A

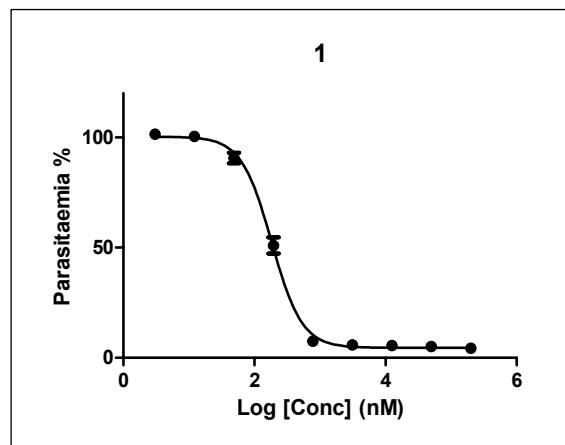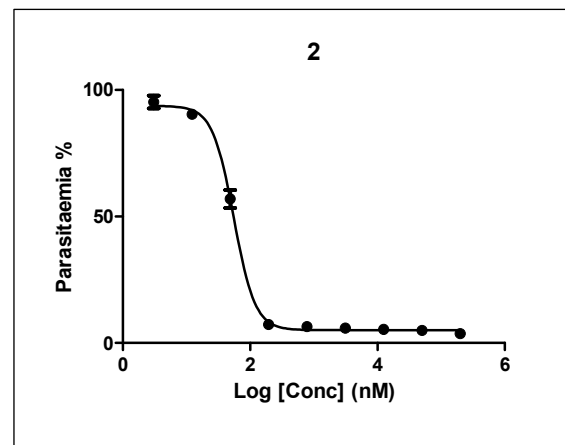

B

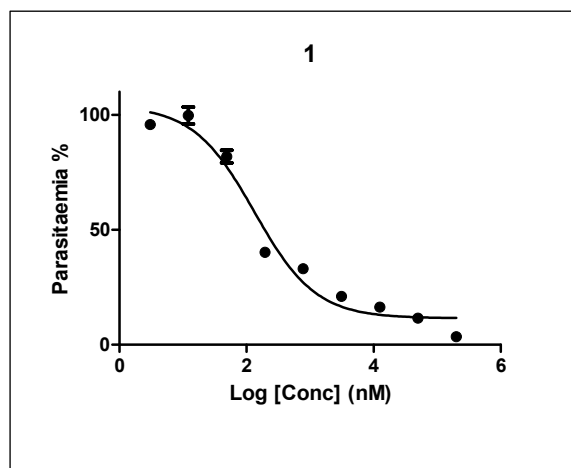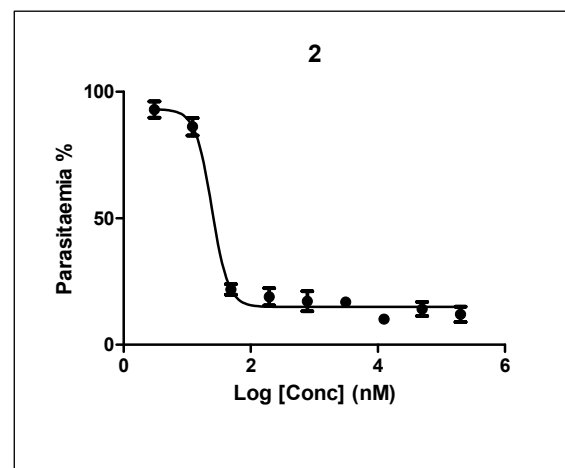

**Figure S6.** The effective dose of the lead 4-aminoquinoline hydrazone compounds **1** & **2** tested on the *P. falciparum* 3D7 A10 (A) and Dd2 (B) strains in a 4-fold serial dilution of dose range from 0.00305 - 200  $\mu$ M. The compounds were incubated for 72 hours and read using SYBER green-based plate reader assay. The experiments were performed three times in triplicates. The data was analysed using GraphPad prism.

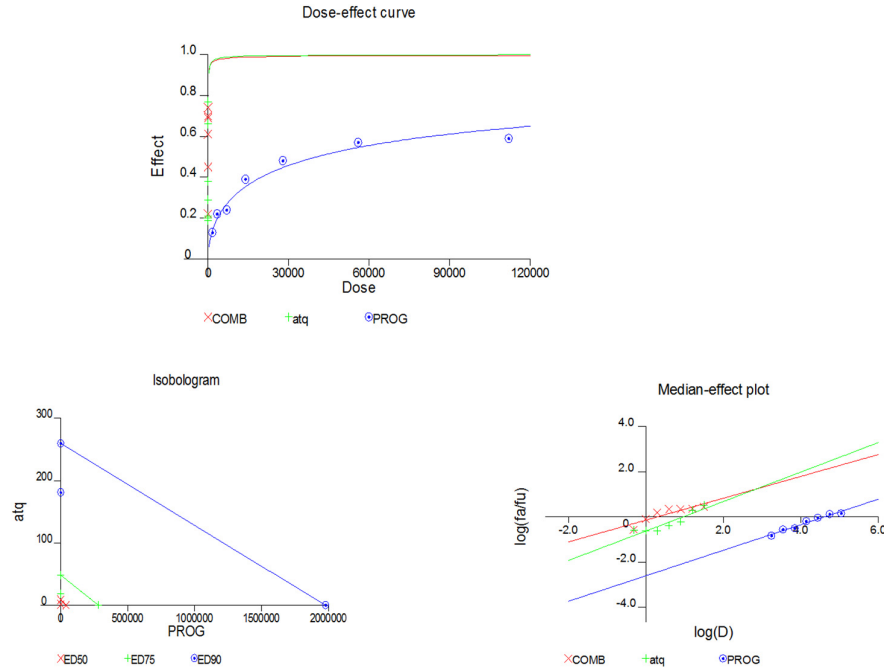

**Figure S7.** Dose effect analysis of atovaquone and proguanil combination on *P. falciparum* K1 strain. The dose-response data was analysed with CalcuSyn software to give a dose-effect curve and isobologram graph.

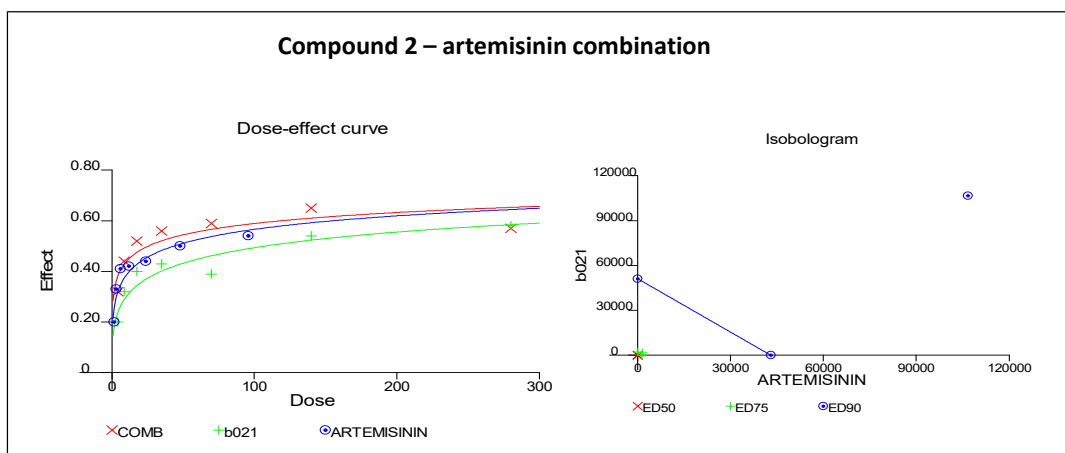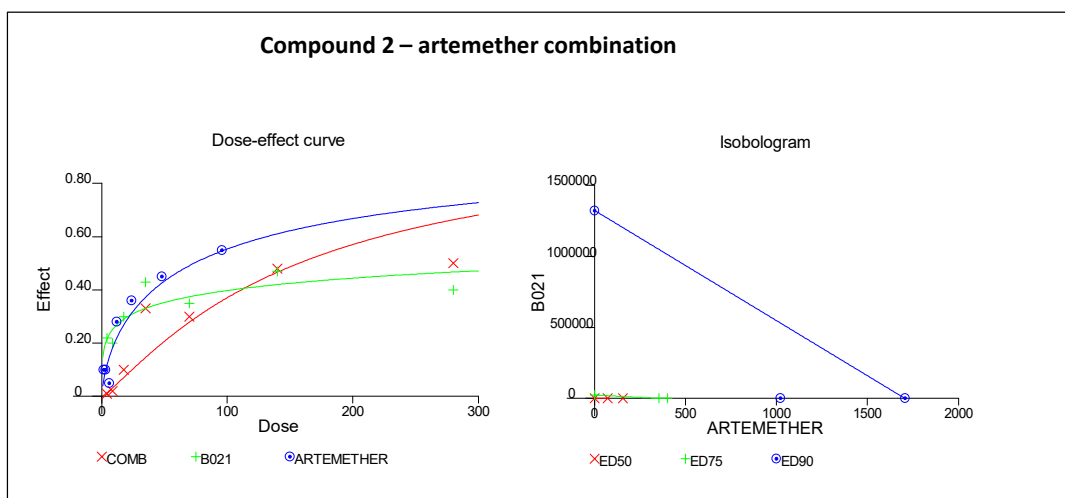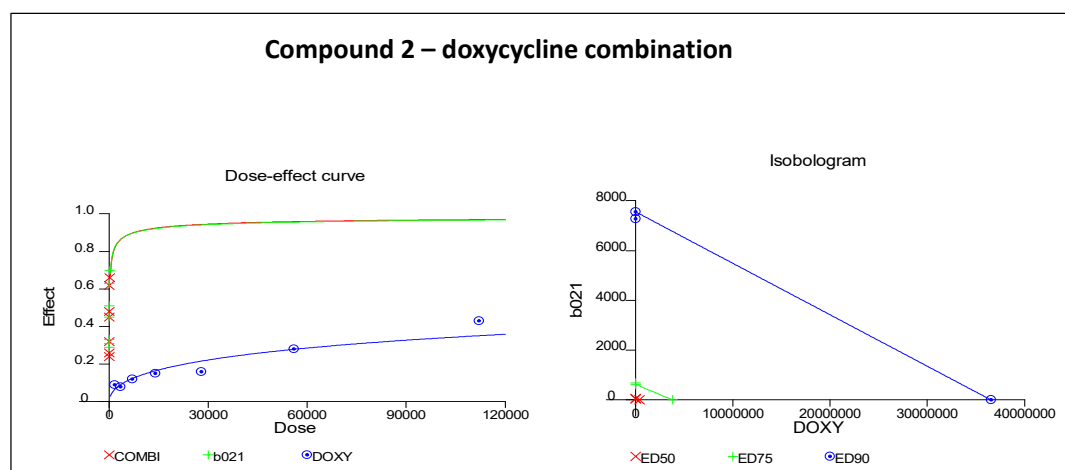

**Figure S8:** Dose effect analysis of Compound 2 and artemisinin, artemether and doxycycline combination on *P. falciparum* K1 strain. The dose-response data was analysed with CalcuSyn software to give dose-effect curve and isobologram graph.
